# Supplementary material
Source: PubMed Central journal article supplement (PMC3057930)
Supplement: NIHMS249737-supplement-Supp_Figure_S1.pdf [file NIHMS249737-supplement-Supp_Figure_S1.pdf]

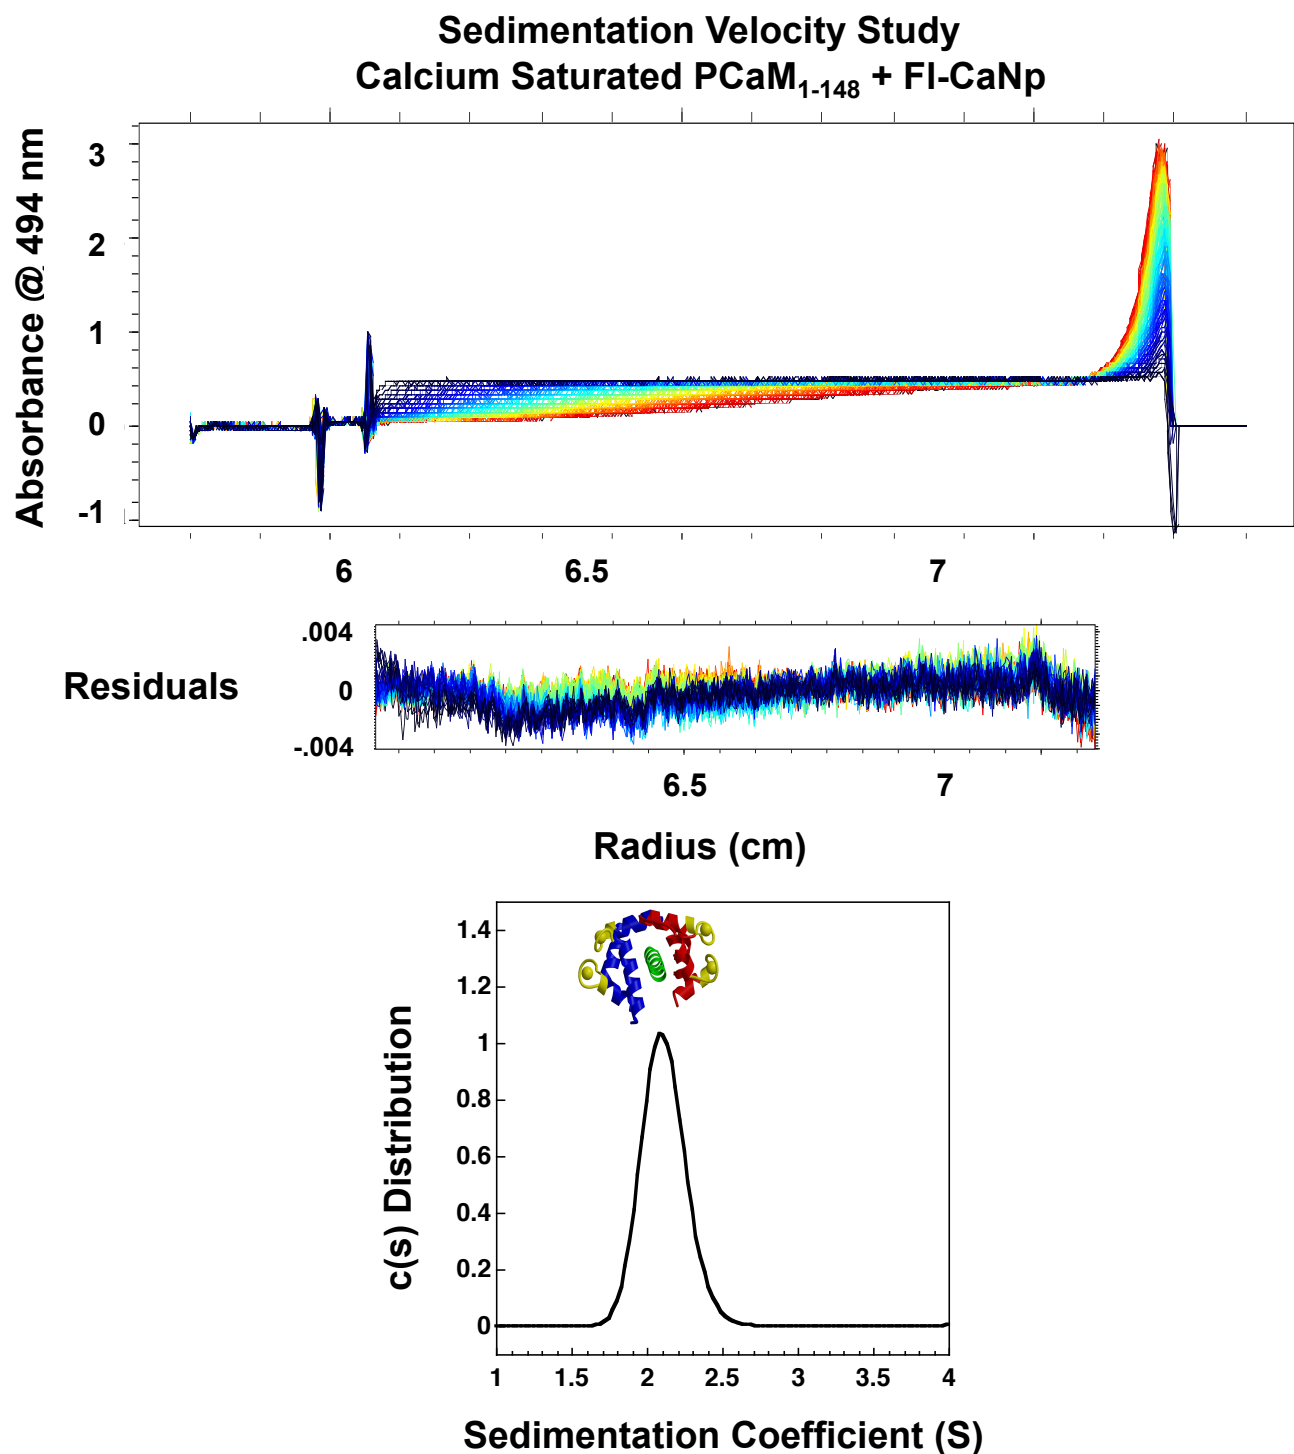

| S    | M <sub>f</sub> (kDa) | Theoretical Mass (kDa) |
|------|----------------------|------------------------|
| 2.07 | 19.4                 | 19.6                   |

**Supplementary Figure 1:** Sedimentation velocity experiment of 8.3  $\mu\text{M}$   $(\text{Ca}^{2+})_4\text{-PCaM}_{1-148}$  in the presence of a slight excess of FI- $\beta\text{CaNp}$ . Sedimentation of FI- $\beta\text{CaNp}$  was monitored by absorbance at 494 nm using a Beckman XL-I analytical ultracentrifuge. Data analysis is described in *Materials and Methods*. Sedimentation data fit using SEDFIT [Schuck (2000), Brown and Schuck (2006)] with model of a single species. The resulting molecular mass (19.4 kDa) corresponded closely with the theoretical mass (19.6 kDa) and not to a 2:2 (39.2 kDa) or 1:2 (22.4 kDa) complex.
