# Supplementary material
Source: PubMed Central journal article supplement (PMC3057930)
Supplement: NIHMS249737-supplement-Supp_Figure_S3.pdf [file NIHMS249737-supplement-Supp_Figure_S3.pdf]

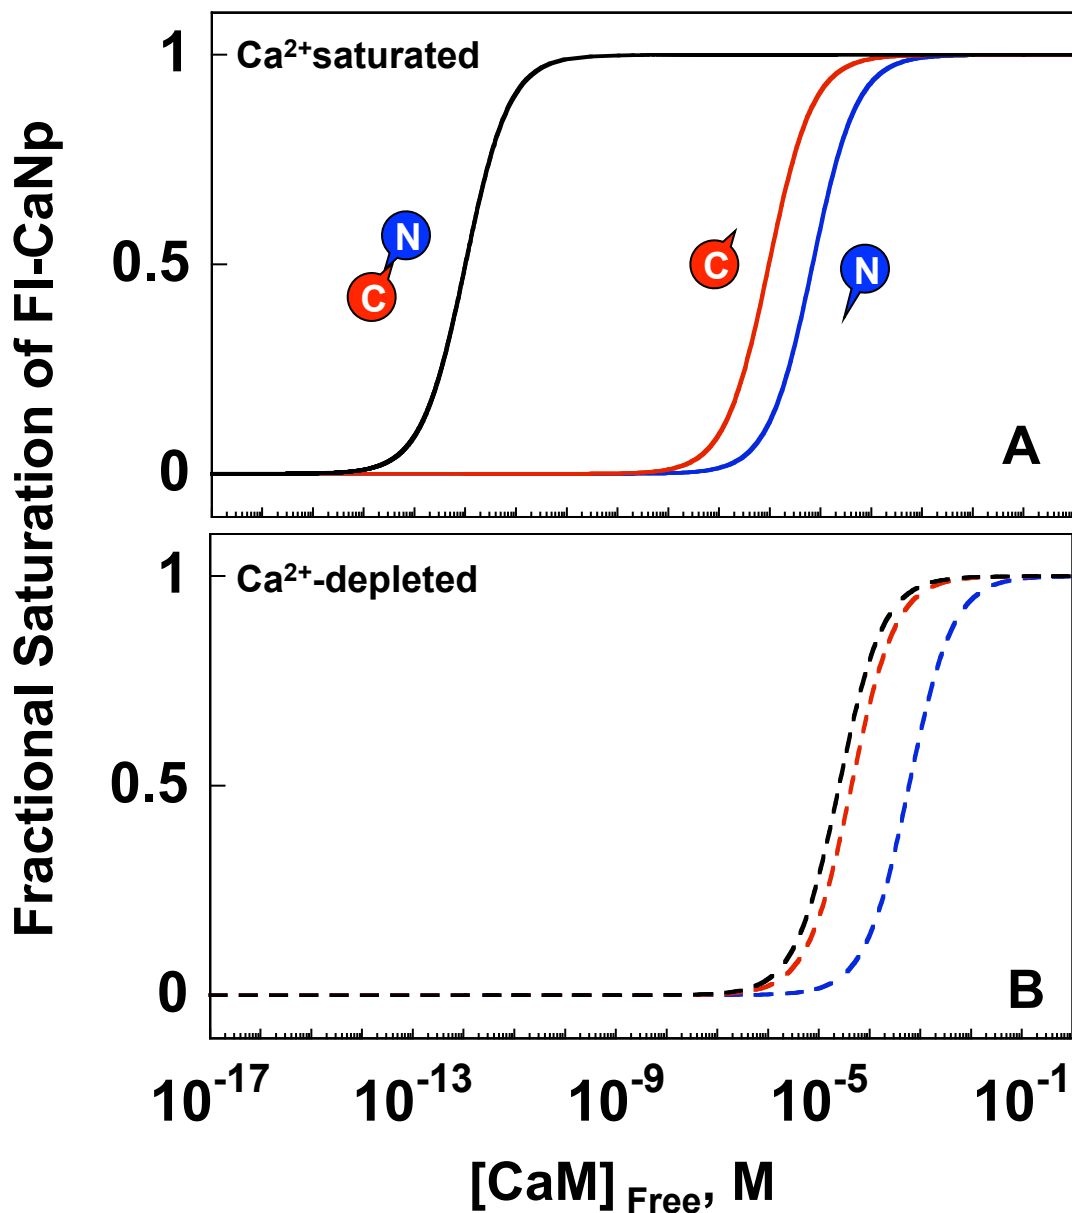

**Supplementary Figure 3:** Fractional saturation curves plotted against  $[CaM]_{Free}$  representing simulations of CaM<sub>1-148</sub> (black), CaM<sub>76-148</sub> (red) and CaM<sub>1-80</sub> (blue) in the presence (A, Ca<sup>2+</sup>-saturated) or absence (B, Ca<sup>2+</sup>-depleted) of 10 mM CaCl<sub>2</sub> binding to FI-CaNp with equilibrium constants reported in Table 2.
