# Supplementary material
Source: PubMed Central journal article supplement (PMC3057930)
Supplement: NIHMS249737-supplement-Supp_Figure_S4.pdf [file NIHMS249737-supplement-Supp_Figure_S4.pdf]

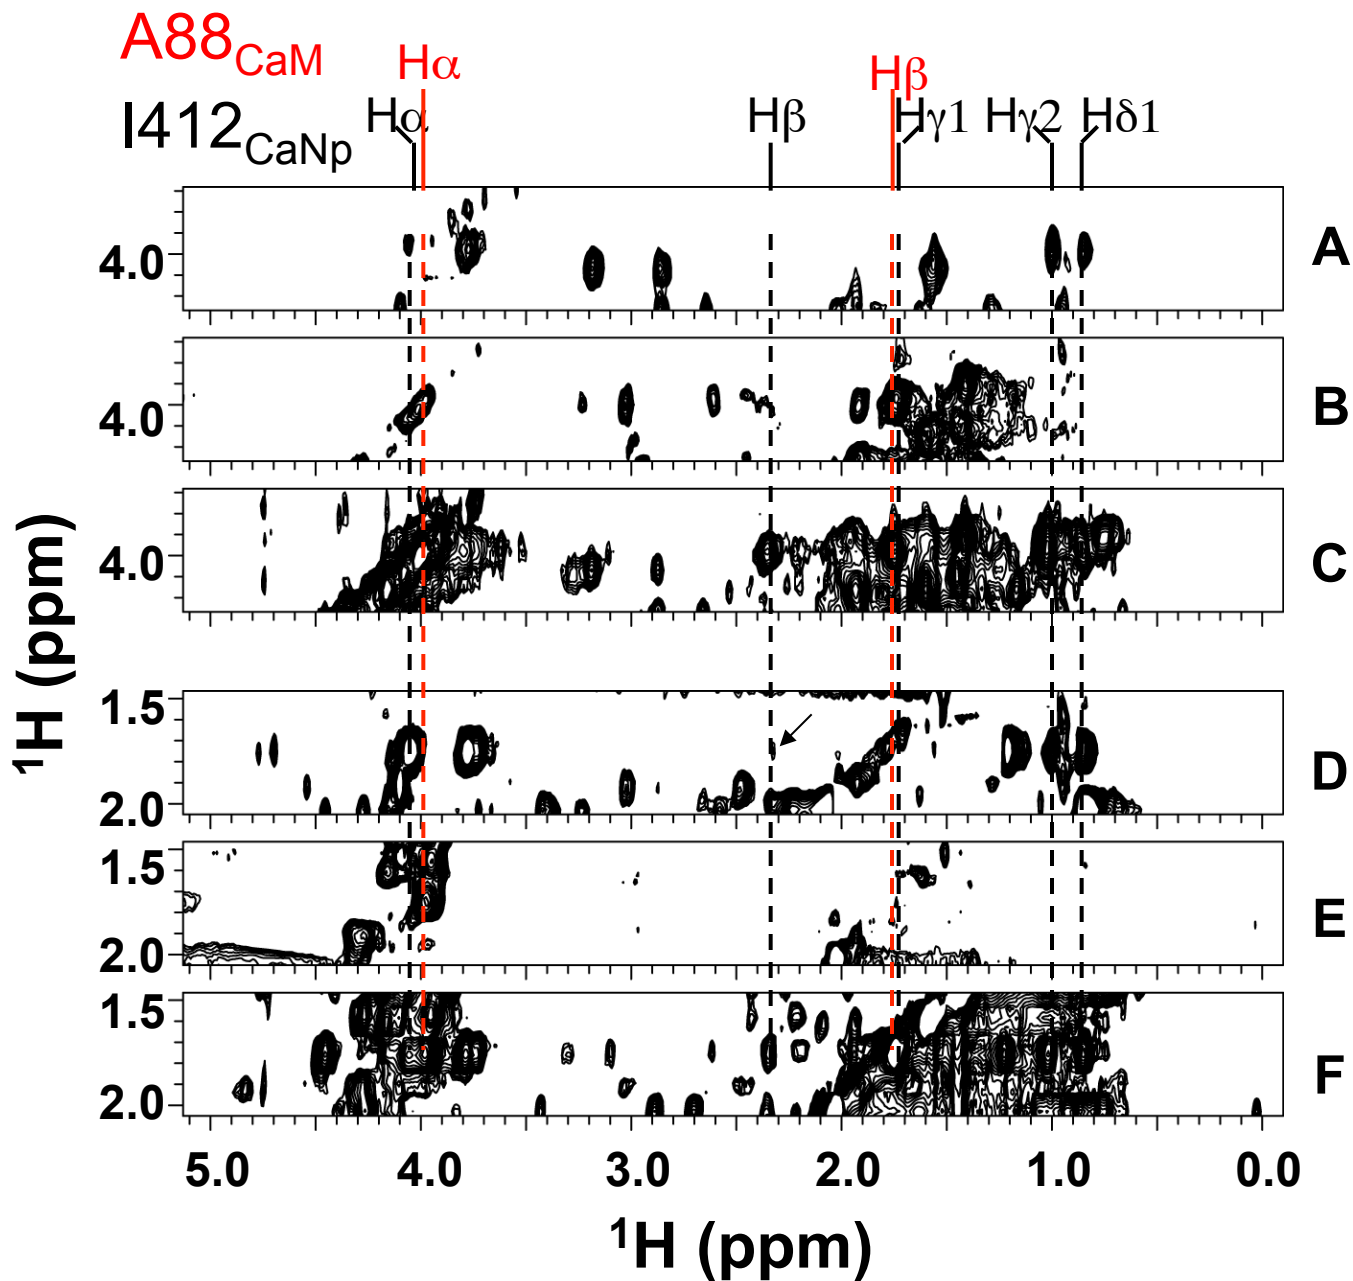

**Supplementary Figure 4:** Intermolecular NOEs between the protons of I412 of  $\beta$ CaNp and A88 protons of  $^{13}\text{C},^{15}\text{N}$ -CaM<sub>1-148</sub>. NOEs detected from the A88 C $\alpha$  (A-C) and C $\beta$  (D-F). Shown are (A, D)  $^{13}\text{C}$  filtered NOESY spectra ( $\beta$ CaNp protons), (B, E) HCCH-TOCSY spectra (CaM protons), and (C, F)  $^{13}\text{C}$  NOESY spectra (all protons). Peptide shifts are indicated by black lines and text while CaM shifts are indicated in red. The arrow in panel D points to a weak intermolecular NOE.
