# Supplementary material
Source: PubMed Central journal article supplement (PMC3057930)
Supplement: NIHMS249737-supplement-Supp_Figure_S6.pdf [file NIHMS249737-supplement-Supp_Figure_S6.pdf]

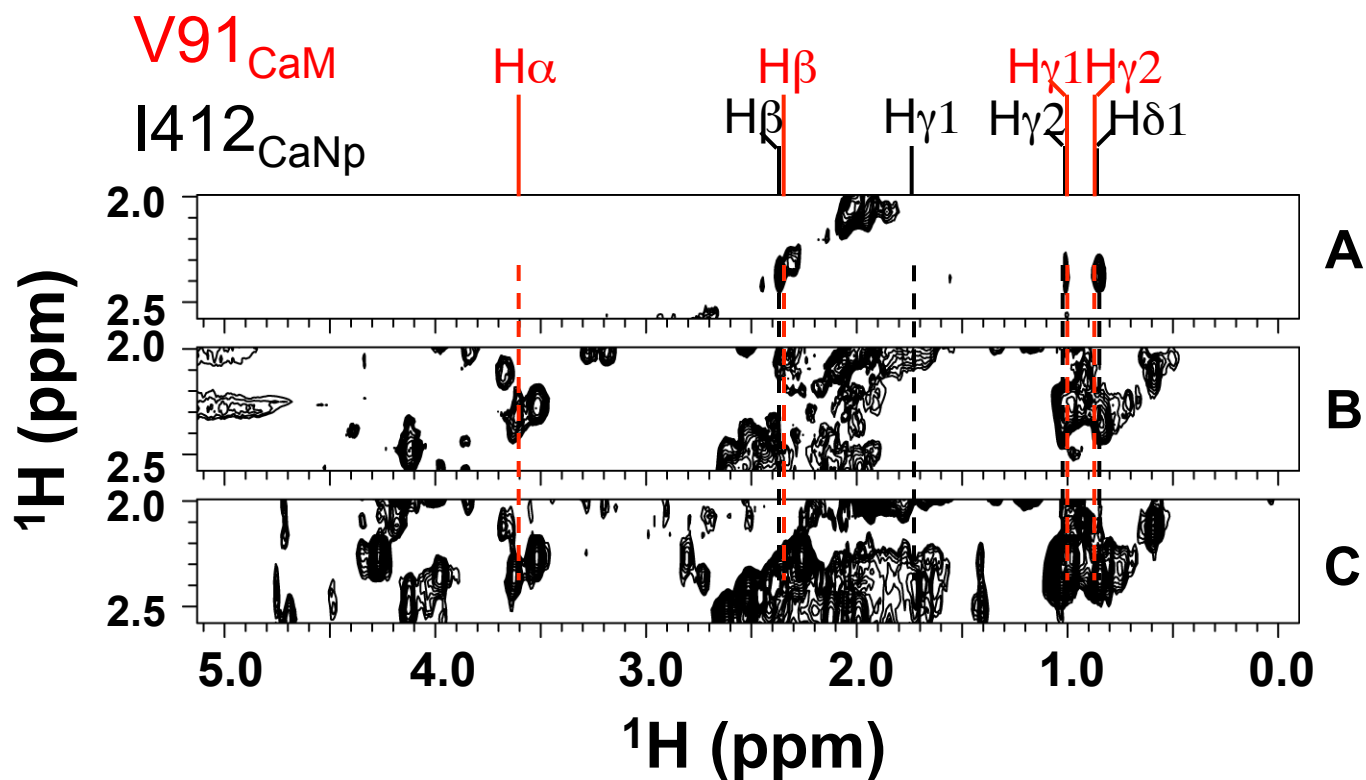

**Supplementary Figure 6:** Intermolecular NOEs between the protons of I412 of  $\beta\text{CaNp}$  and the V91 beta protons of  $^{13}\text{C}, ^{15}\text{N}\text{-CaM}_{1-148}$ . Shown are (A)  $^{13}\text{C}$  filtered NOESY spectra ( $\beta\text{CaNp}$  protons), (B) HCCH-TOCSY spectra (CaM protons), and (C)  $^{13}\text{C}$  NOESY spectra (all protons). Peptide shifts are indicated by black lines and text, while CaM shifts are indicated in red.
