# Supplementary material
Source: PubMed Central journal article supplement (PMC3057930)
Supplement: NIHMS249737-supplement-Supp_Figure_S7.pdf [file NIHMS249737-supplement-Supp_Figure_S7.pdf]

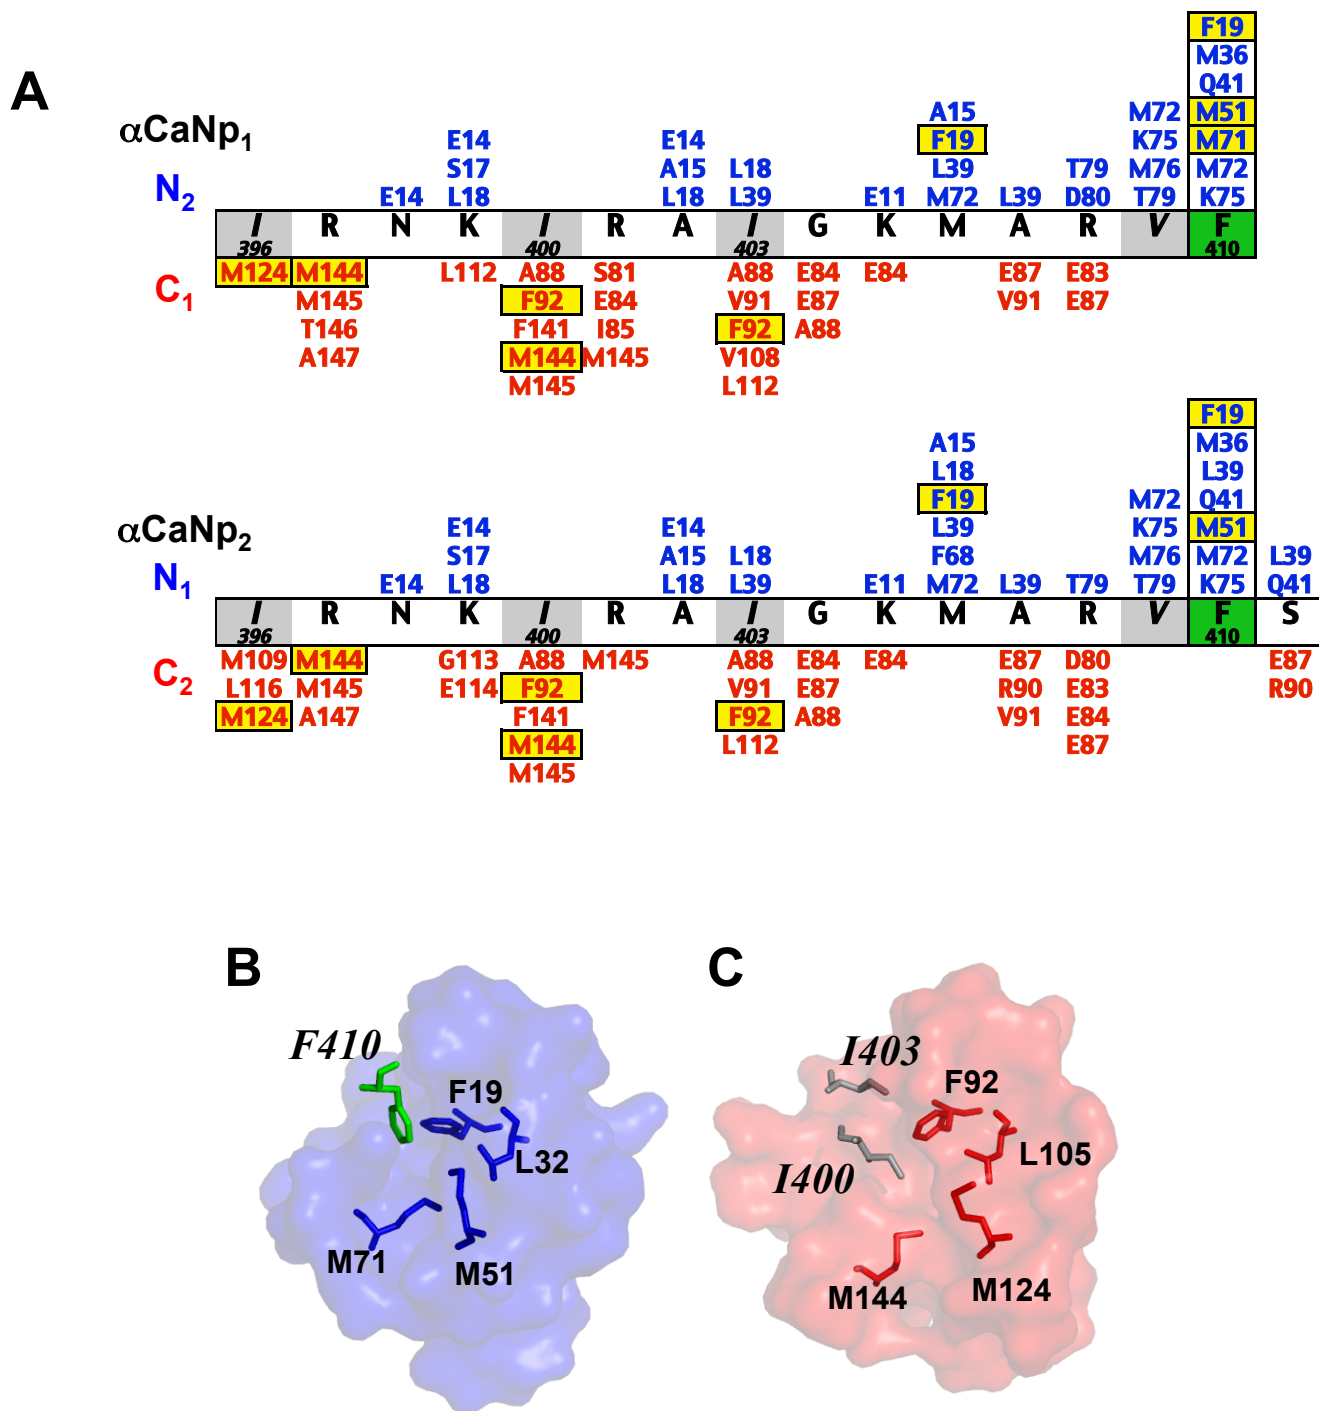

**Supplementary Figure 7:** Distribution of CaM contacts in the CaM-CaNp complex. (A) Sequence map of CaM residues within 4.5 Å of individual residues of CaNp<sub>1</sub> and CaNp<sub>2</sub> in 2R28.pdb. Residues highlighted in yellow represent the FLMM residues of CaM. The 1-5-8-14 BAA motif residues of CaNp are shaded in grey. In both CaM-CaNp complexes, F410 (boxed) had the highest number of contacts to a single N-domain. Residues 391-395 of CaNp<sub>2</sub> made no contacts with CaM. Residues located at the terminal ends of the peptide, which had no contact with CaM, are not shown. Occupancy of the (B) N-domain FLMM pocket and (C) C-domain FLMM pocket by F410 (green) and I400 and I403 (grey) anchor residues.
